# Supplementary material for: In Vitro Stability and Pharmacokinetic Study of Pedunculoside and Its Beta-CD Polymer Inclusion Complex
Source: MDPI journal article supplement (doi:10.3390/pharmaceutics16050591), 2024-04-26
Supplement: s1 [file s1]

# **In vitro Stability and Pharmacokinetic Study of Pedunculoside and its Beta-CD Polymer Inclusion Complex**

Liang Wu <sup>1,2,\*</sup>, Danfeng Li <sup>1</sup>, Peijing Wang <sup>1</sup>, Linling Dong <sup>1</sup>, Wang Zhang <sup>3,4</sup>, Jianjun Xu <sup>1</sup>, and Xiaoliang Jin <sup>5,\*</sup>

<sup>1</sup> School of Pharmacy, Nanjing University of Chinese Medicine, Nanjing 210023, China

<sup>2</sup> State Key Laboratory Cultivation Base for TCM Quality and Efficacy, Nanjing University of Chinese Medicine, Nanjing 210023, China

<sup>3</sup> School of Chemistry and Chemical Engineering, Yangzhou University, Yangzhou 225009, China

<sup>4</sup> Department of Applied Bioengineering, Graduate School of Convergence Science and Technology, Seoul National University, Seoul 08826, Republic of Korea

<sup>5</sup> Clinical Pharmacology Department, Changchun GeneScience Pharmaceutical Co., Ltd. Shanghai 200235, China

\* Corresponding author:

Dr. Liang Wu,

State Key Laboratory Cultivation Base for TCM Quality and Efficacy, School of Pharmacy, Nanjing University of Chinese Medicine, 138 Xianlin Road, Nanjing 210023, China; E-mail: wuliang@njucm.edu.cn

Dr. Xiaoliang Jin,

Clinical Pharmacology Department, Clinical Research and Development Center, Changchun GeneScience Pharmaceutical Co., Ltd., 88 Hongcao Road, Shanghai 200235, China; E-mail: jinxiaoliang@genscigroup.com

**Table S1.** Detail information of the calibration curves of pedunculoside and rotundic acid in rat plasma

| pedunculoside | calibration curve       | r <sup>2</sup> | Accuracy (%) of the Spiked Concentration (ng/mL) |        |        |        |        |        |       |        |        |
|---------------|-------------------------|----------------|--------------------------------------------------|--------|--------|--------|--------|--------|-------|--------|--------|
|               |                         |                | 2.5                                              | 5      | 10     | 20     | 50     | 100    | 200   | 500    | 1000   |
| 1             | y = 0.04632 x + 0.05326 | 0.99777        | 105.14                                           | 95.07  | 85.49  | 104.97 | 108.54 | 100.65 | 96.32 | 106.73 | 97.09  |
| 2             | y = 0.04389 x + 0.03438 | 0.99709        | 87.73                                            | 101.95 | 99.77  | 103.06 | 109.93 | 95.77  | 97.19 | 108.05 | 96.55  |
| 3             | y = 0.04689 x + 0.02684 | 0.99816        | 103.66                                           | 104.10 | 99.16  | 94.91  | 109.77 | 94.15  | 90.86 | 101.79 | 101.59 |
| 4             | y = 0.03754 x + 0.01463 | 0.99783        | 98.45                                            | 106.05 | 100.49 | 94.17  | 100.06 | 98.83  | 97.25 | 107.57 | 97.13  |
| 5             | y = 0.03710 x + 0.01711 | 0.99867        | 99.31                                            | 106.58 | 95.85  | 101.89 | 99.11  | 100.27 | 92.90 | 104.68 | 99.41  |
| 6             | y = 0.03812 x + 0.01741 | 0.99720        | 90.52                                            | 97.88  | 100.24 | 101.21 | 111.13 | 99.13  | 95.33 | 107.70 | 96.85  |

| rotundic acid | calibration curve       | r <sup>2</sup> | Accuracy (%) of the Spiked Concentration (ng/mL) |        |        |        |        |        |        |        |  |
|---------------|-------------------------|----------------|--------------------------------------------------|--------|--------|--------|--------|--------|--------|--------|--|
|               |                         |                | 5                                                | 10     | 20     | 50     | 100    | 200    | 500    | 1000   |  |
| 1             | y = 0.01289 x + 0.03038 | 0.99918        | 82.83                                            | 98.80  | 104.81 | 110.66 | 104.28 | 98.16  | 101.95 | 98.50  |  |
| 2             | y = 0.01021 x + 0.02882 | 0.99938        | 85.51                                            | 106.41 | 103.43 | 108.83 | 97.44  | 99.93  | 97.40  | 101.06 |  |
| 3             | y = 0.01252 x + 0.02143 | 0.99730        | 81.73                                            | 96.34  | 110.84 | 111.14 | 109.62 | 91.46  | 96.79  | 102.08 |  |
| 4             | y = 0.01312 x - 0.00318 | 0.99938        | 107.16                                           | 108.08 | 97.53  | 92.47  | 96.81  | 96.04  | 100.54 | 101.36 |  |
| 5             | y = 0.01167 x + 0.01430 | 0.99912        | 89.50                                            | 94.91  | 106.15 | 100.13 | 107.74 | 104.49 | 98.07  | 99.01  |  |
| 6             | y = 0.01374 x + 0.01433 | 0.99850        | 89.30                                            | 104.26 | 104.37 | 104.52 | 103.05 | 91.39  | 103.18 | 99.93  |  |

Subject=1

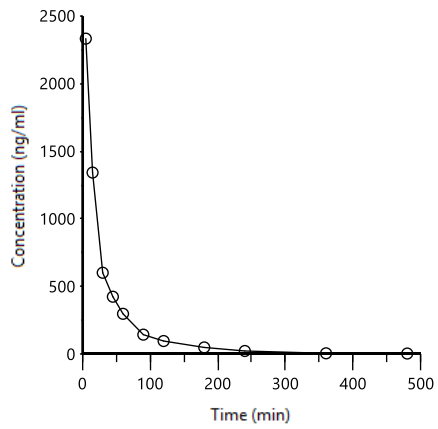

Subject=1

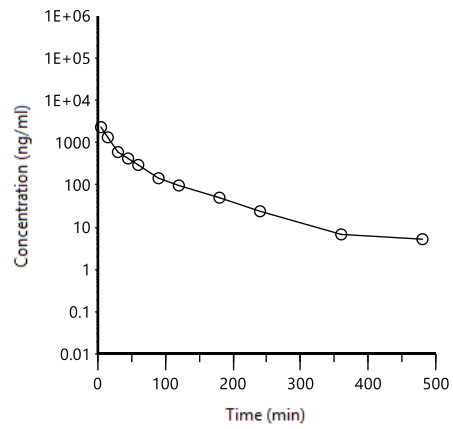

Subject=2

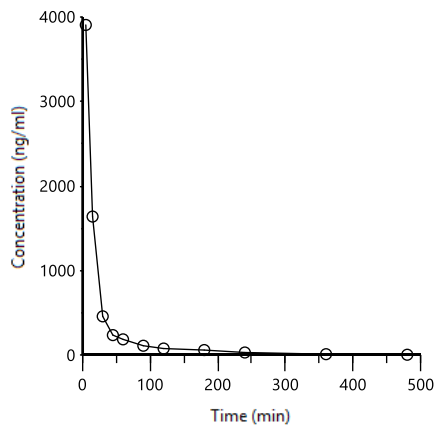

Subject=2

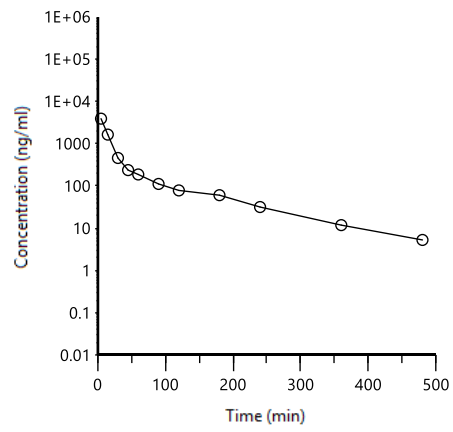

Subject=3

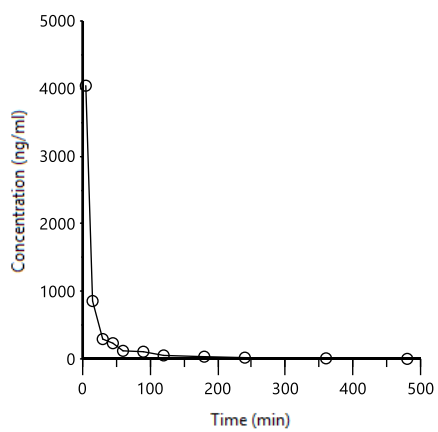

Subject=3

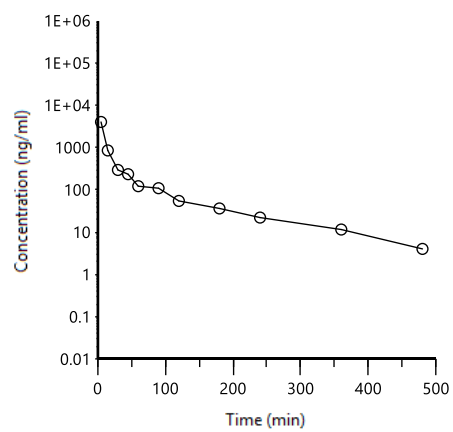

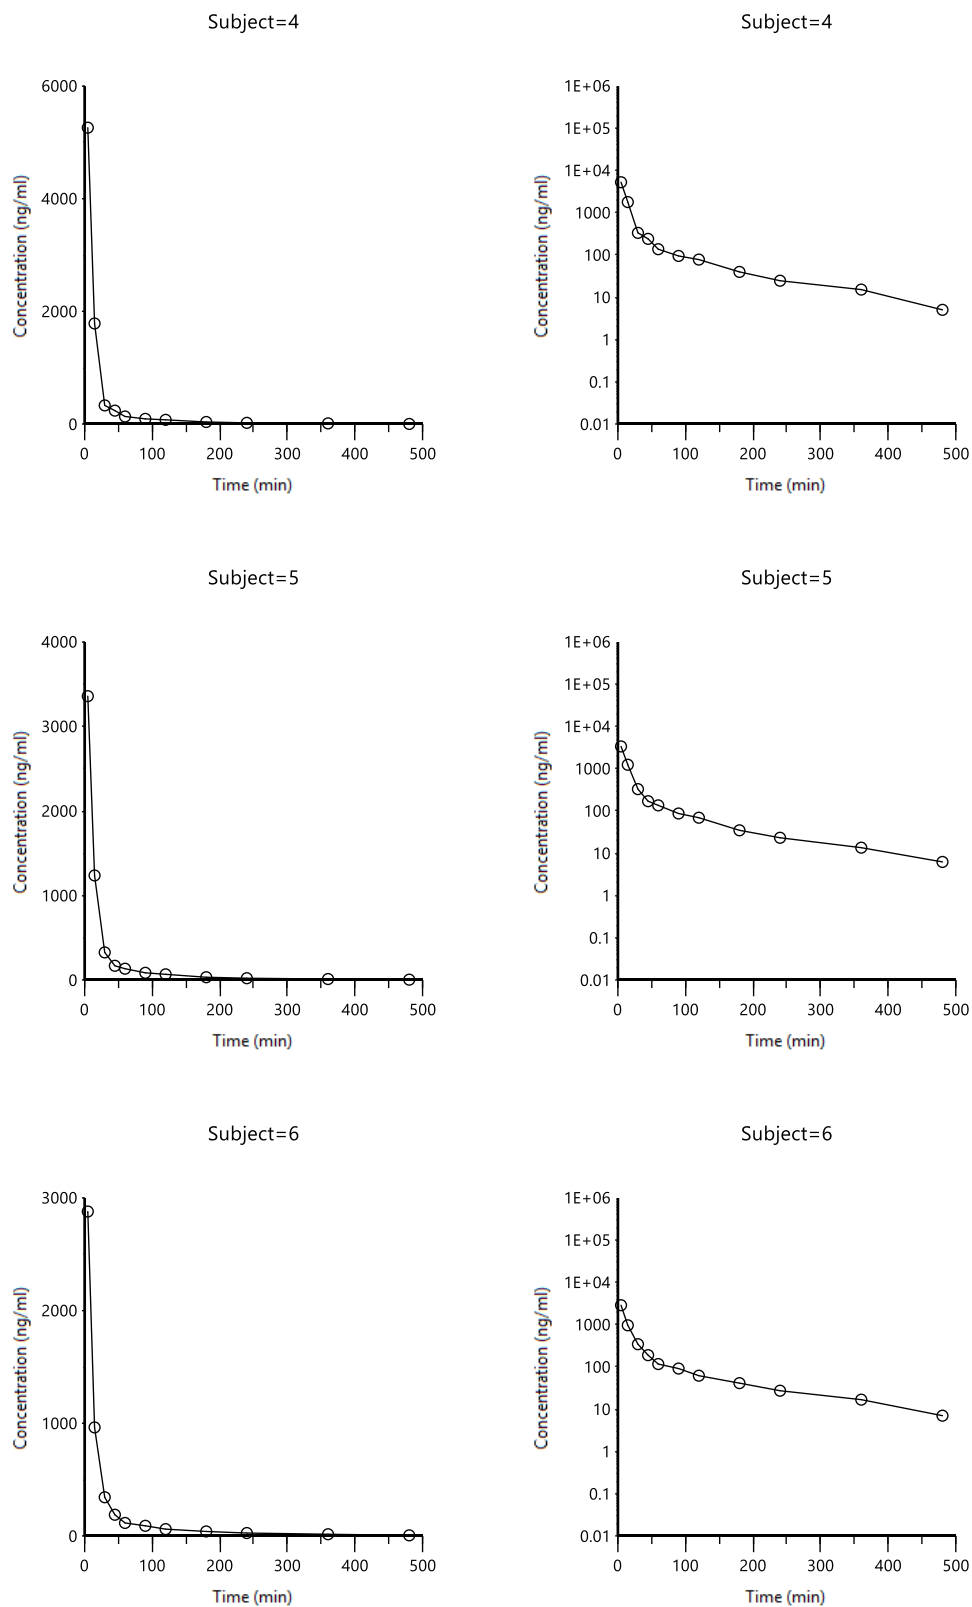

**Figure S1.** Plasma concentration-time curves for pedunculocide in rats after intravenous administration of pedunculocide

Subject=1

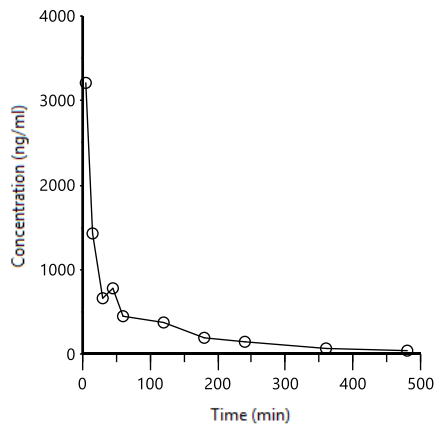

Subject=1

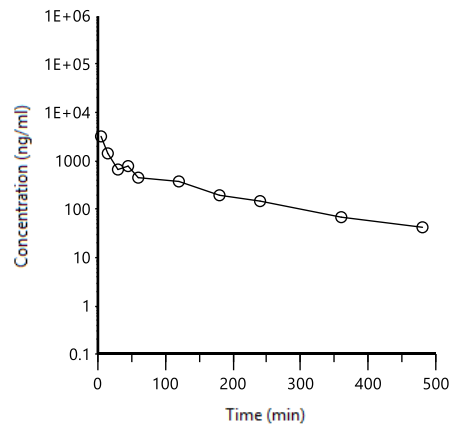

Subject=2

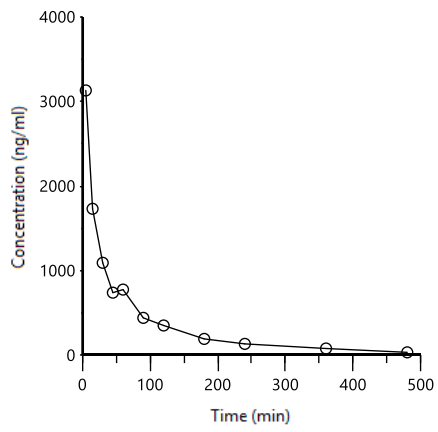

Subject=2

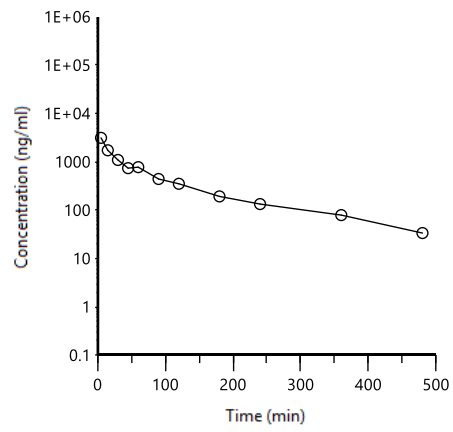

Subject=3

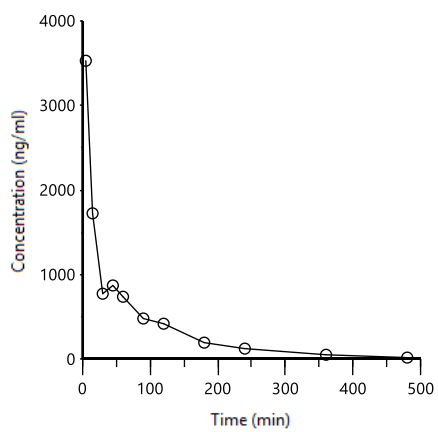

Subject=3

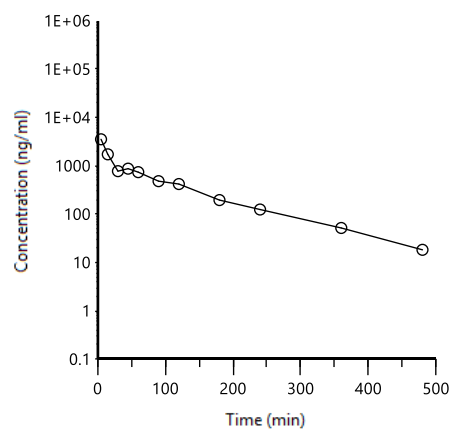

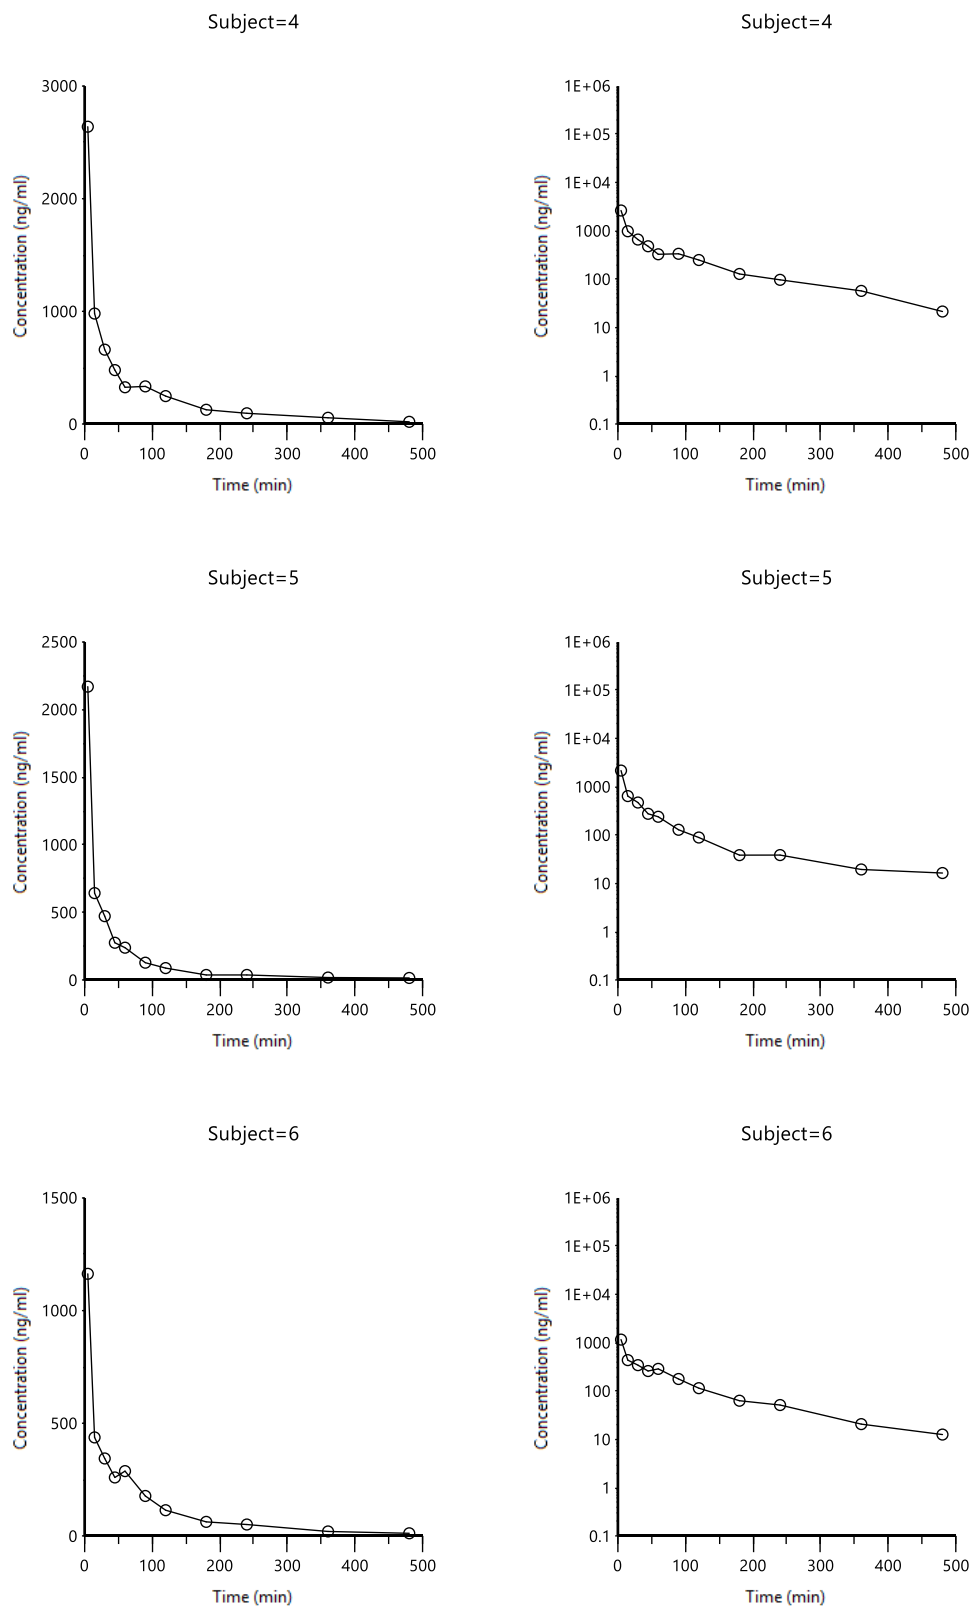

**Figure S2.** Plasma concentration-time curves for pedunculoside in rats after intravenous administration of pedunculoside- $\beta$ CDP
